# Supplementary material for: Endoscopic Nipple- or Skin-Sparing Mastectomy and Immediate Breast Reconstruction with Endoscopic Harvesting of the Latissimus Dorsi Flap: A Preliminary Experience of an Innovative Technique
Source: Breast J. 2022 Oct 27;2022:1373899. doi: 10.1155/2022/1373899 (PMC9633195; doi:10.1155/2022/1373899)
Supplement: Supplementary Materials — Video 1: Surgical procedures of immediate breast reconstruction with latissimus dorsi flap of breast cancer patients after Nipple-sparing mastectomy under endoscope. [file 1373899.f1.zip]

Archive with 2 entries (2 files):
- 1373899.f1.docx
- supplementary video 1.mp4
